# Supplementary material for: Mediating and Moderating Effects of Iron Homeostasis Alterations on Fetal Alcohol-Related Growth and Neurobehavioral Deficits
Source: MDPI journal article supplement (doi:10.3390/nu14204432), 2022-10-21
Supplement: s1 [file s1]

Supplementary Materials for:

Mediating and Moderating Effects of Iron Homeostasis Alterations on Fetal Alcohol–Related Growth and Neurobehavioral Deficits

R. Colin Carter, Neil C. Dodge, Christopher D. Molteno, Ernesta M. Meintjes, Joseph L. Jacobson and Sandra W. Jacobson

Table S1. Relation of potential confounders to neurobehavioral outcomes<sup>a</sup>

|                          | 2-wk<br>weight <sup>b</sup> | 2-wk<br>length <sup>b</sup> | 2-wk<br>head<br>circum-<br>ference <sup>b</sup> | 5-yr<br>weight <sup>b</sup> | 5-yr<br>length <sup>b</sup> | 5-yr head<br>circum-<br>ference | Visual<br>recognition<br>memory <sup>c</sup><br>(6.5 mo) | Visual<br>recognition<br>memory <sup>c</sup><br>(12 mo) | Mean<br>look<br>time <sup>c</sup><br>(6.5 mo) | Mean<br>look<br>time <sup>c</sup><br>(12 mo) | Symbolic<br>play <sup>d</sup> | EAS <sup>e</sup><br>shy-<br>ness | EAS <sup>e</sup><br>emotio-<br>nality | EAS <sup>e</sup><br>socia-<br>bility | EAS <sup>e</sup><br>act-<br>ivity |
|--------------------------|-----------------------------|-----------------------------|-------------------------------------------------|-----------------------------|-----------------------------|---------------------------------|----------------------------------------------------------|---------------------------------------------------------|-----------------------------------------------|----------------------------------------------|-------------------------------|----------------------------------|---------------------------------------|--------------------------------------|-----------------------------------|
| Maternal age             | -0.16 <sup>†</sup>          | -0.12                       | -0.17 <sup>*</sup>                              | -0.14 <sup>†</sup>          | -0.11                       | -0.04                           | -0.15 <sup>†</sup>                                       | 0.00                                                    | -0.11                                         | 0.06                                         | -0.03                         | 0.00                             | 0.05                                  | -0.10                                | 0.00                              |
| Gravidity                | -0.10                       | -0.05                       | -0.12                                           | -0.13                       | -0.02                       | -0.04                           | -0.14 <sup>†</sup>                                       | -0.03                                                   | -0.01                                         | 0.01                                         | -0.03                         | 0.09                             | 0.17 <sup>*</sup>                     | -0.17 <sup>*</sup>                   | 0.03                              |
| Maternal education       | 0.26 <sup>**</sup>          | 0.29 <sup>***</sup>         | 0.17 <sup>†</sup>                               | 0.32 <sup>***</sup>         | 0.23 <sup>**</sup>          | 0.01                            | 0.09                                                     | -0.03                                                   | 0.03                                          | -0.07                                        | 0.15 <sup>†</sup>             | 0.08                             | 0.02                                  | 0.02                                 | 0.00                              |
| Cigarettes/day           | -0.23 <sup>**</sup>         | -.19 <sup>*</sup>           | -0.19 <sup>*</sup>                              | -0.19 <sup>*</sup>          | -0.14 <sup>†</sup>          | 0.03                            | 0.02                                                     | -0.06                                                   | -0.12                                         | 0.08                                         | 0.07                          | 0.15 <sup>†</sup>                | 0.12                                  | -0.08                                | 0.02                              |
| Marijuana use            | 0.00                        | 0.00                        | -0.02                                           | -0.07                       | 0.03                        | -0.09                           | -0.06                                                    | -0.13                                                   | 0.18 <sup>*</sup>                             | 0.10                                         | 0.13                          | 0.14 <sup>†</sup>                | 0.11                                  | -0.05                                | -0.17 <sup>*</sup>                |
| Methamphetamine use      | -0.06                       | -0.10                       | -0.07                                           | -0.02                       | -0.06                       | 0.05                            | 0.06                                                     | -0.03                                                   | -0.05                                         | -0.02                                        | 0.10                          | -0.04                            | 0.06                                  | 0.13 <sup>†</sup>                    | 0.01                              |
| Wk gestation at delivery | 0.57 <sup>**</sup>          | 0.52 <sup>**</sup>          | 0.58 <sup>**</sup>                              | 0.34 <sup>**</sup>          | 0.28 <sup>***</sup>         | 0.07                            | 0.16 <sup>†</sup>                                        | 0.03                                                    | 0.07                                          | -0.11                                        | 0.21 <sup>**</sup>            | -0.11                            | -0.05                                 | 0.08                                 | 0.09                              |
| Infant sex               | -0.01                       | -0.03                       | 0.07                                            | -0.04                       | -0.14 <sup>†</sup>          | 0.09                            | 0.00                                                     | 0.01                                                    | 0.02                                          | 0.03                                         | 0.21 <sup>*</sup>             | 0.10                             | 0.05                                  | -0.13                                | -0.19 <sup>*</sup>                |
| Age at assessment        | --                          | --                          | --                                              | --                          | --                          | 0.05                            | 0.01                                                     | -0.03                                                   | -0.05                                         | 0.01                                         | -0.25 <sup>**</sup>           | 0.03                             | 0.00                                  | 0.10                                 | 0.07                              |

<sup>a</sup>Values are Pearson *r*'s.

<sup>b</sup>Age/sex-specific z-scores from World Health Organization norms [1]; *n* = 61 controls, 69 heavily exposed at 2 wk; 67 controls, 80 heavily exposed at 5 yr.

<sup>c</sup>From the Fagan Test of Infant Intelligence [2,3]; *n* = 69 controls, 75 heavily exposed at 6.5 mo; 65 controls, 79 heavily exposed at 12 mo.

<sup>d</sup>Highest level of complexity of imitated play [4]; *n* = 64 controls, 78 heavily exposed.

<sup>e</sup>Emotionality, Activity, Sociability Temperament scale [5]; *n* = 70 controls, 81 heavily exposed.

<sup>†</sup>*p* < 0.10; <sup>\*</sup>*p* < 0.05; <sup>\*\*</sup>*p* < 0.01; <sup>\*\*\*</sup>*p* < 0.001.

**Table S2. Potential interaction effects between prenatal alcohol exposure and iron indices (II) on infant growth, neurobehavior, and temperament<sup>a</sup>**

**(A) Anthropometry measures**

| <b>2-wk length-for-age z-scores<sup>b</sup></b>             | <b>B<sub>PAE</sub></b>              | <b>B<sub>II</sub></b>  | <b>B<sub>PAE by II</sub></b> | <b>P<sub>PAE by II</sub></b> |
|-------------------------------------------------------------|-------------------------------------|------------------------|------------------------------|------------------------------|
| <u>Maternal iron indices</u>                                |                                     |                        |                              |                              |
| Ferritin (logged ug/L values) <sup>c</sup>                  | 0.84<br>(-0.96, 2.63)               | -0.24<br>(-0.81, 0.34) | -0.38<br>(-1.06, 0.30)       | 0.273                        |
| Hemoglobin (g/dL)                                           | -0.88<br>(-5.32, 3.56)              | -0.03<br>(-0.31, 0.24) | 0.05<br>(-0.35, 0.45)        | 0.812                        |
| Hemoglobin:log(ferritin) <sup>d</sup>                       | -1.90 <sup>†</sup><br>(-4.02, 0.22) | 0.09<br>(-0.27, 0.44)  | 0.39<br>(-0.08, 0.87)        | <b>0.105</b>                 |
| <u>Neonatal iron indices</u>                                |                                     |                        |                              |                              |
| Ferritin (logged ug/L values) <sup>c</sup>                  | 1.60<br>(-1.78, 4.98)               | 0.11<br>(-1.78, 4.98)  | -0.34<br>(-0.97, 0.30)       | 0.293                        |
| Hemoglobin (g/dL)                                           | -1.75<br>(-4.43, 0.93)              | 0.06<br>(-0.05, 0.17)  | 0.11<br>(-0.07, 0.28)        | 0.230                        |
| Hemoglobin:log(ferritin) <sup>d</sup>                       | -2.68*<br>(-4.92, -0.44)            | 0.02<br>(-0.50, 0.45)  | 0.89<br>(0.14, 1.65)         | <b>0.021</b>                 |
| <u>2-wk weight-for-age z-scores<sup>b</sup></u>             |                                     |                        |                              |                              |
| <u>Maternal iron indices</u>                                |                                     |                        |                              |                              |
| Ferritin (logged ug/L values) <sup>c</sup>                  | 0.52<br>(-1.22, 2.25)               | -0.10<br>(-0.67, 0.46) | -0.31<br>(-0.97, 0.35)       | 0.360                        |
| Hemoglobin (g/dL)                                           | 0.22<br>(-3.93, 4.37)               | 0.04<br>(-0.22, 0.29)  | -0.06<br>(-0.43, 0.32)       | 0.763                        |
| Hemoglobin:log(ferritin) <sup>d</sup>                       | -1.29<br>(-3.32, 0.73)              | 0.08<br>(-0.26, 0.42)  | 0.23<br>(-0.23, 0.68)        | 0.323                        |
| <u>Neonatal iron indices</u>                                |                                     |                        |                              |                              |
| Ferritin (logged ug/L values) <sup>c</sup>                  | 0.67<br>(-2.52, 3.85)               | 0.06<br>(-0.33, 0.45)  | -0.19<br>(-0.78, 0.41)       | 0.541                        |
| Hemoglobin (g/dL)                                           | -3.21*<br>(-5.75, -0.67)            | 0.02<br>(-0.09, 0.12)  | 0.20*<br>(0.03, 0.36)        | <b>0.020</b>                 |
| Hemoglobin:log(ferritin) <sup>d</sup>                       | -2.97**<br>(-5.15, 0.79)            | -0.08<br>(-0.55, 0.38) | 0.96*<br>(0.22, 1.70)        | <b>0.011</b>                 |
| <u>2-wk head circumference-for-age z-scores<sup>b</sup></u> |                                     |                        |                              |                              |
|                                                             | <b>B<sub>PAE</sub></b>              | <b>B<sub>II</sub></b>  | <b>B<sub>PAE by II</sub></b> | <b>P<sub>PAE by II</sub></b> |

|                                                 |                        |                       |                              |                              |
|-------------------------------------------------|------------------------|-----------------------|------------------------------|------------------------------|
| <u>Maternal iron indices</u>                    |                        |                       |                              |                              |
| Ferritin (logged ug/L values) <sup>c</sup>      | 1.55 <sup>†</sup>      | 0.15                  | -0.74*                       | <b>0.028</b>                 |
|                                                 | (-0.19, 3.28)          | (-0.41, 0.71)         | (-1.39, 0.08)                |                              |
| Hemoglobin (g/dL)                               | 1.77                   | 0.14                  | -0.21                        | 0.291                        |
|                                                 | (-2.50, 6.05)          | (-0.13, 0.41)         | (-0.60, 0.18)                |                              |
| Hemoglobin:log(ferritin) <sup>d</sup>           | -2.18*                 | 0.05                  | 0.42 <sup>†</sup>            | <b>0.074</b>                 |
|                                                 | (-4.23, -0.13)         | (-0.29, 0.40)         | (-0.04, 0.88)                |                              |
| <u>Neonatal iron indices</u>                    |                        |                       |                              |                              |
| Ferritin (logged ug/L values) <sup>c</sup>      | -0.76                  | 0.09                  | 0.08                         | 0.803                        |
|                                                 | (-4.08, 2.57)          | (-0.30, 0.49)         | (-0.54, 0.70)                |                              |
| Hemoglobin (g/dL)                               | -0.68                  | 0.07                  | 0.02                         | 0.799                        |
|                                                 | (-3.15, 1.79)          | (-0.03, 0.17)         | (-0.14, 0.18)                |                              |
| Hemoglobin:log(ferritin) <sup>d</sup>           | -0.26                  | 0.13                  | -0.03                        | 0.943                        |
|                                                 | (-2.33, 1.80)          | (-0.31, 0.56)         | (-0.72, 0.67)                |                              |
| <hr/>                                           |                        |                       |                              |                              |
| <b>5-yr length-for-age z-scores<sup>b</sup></b> | <b>B<sub>PAE</sub></b> | <b>B<sub>II</sub></b> | <b>B<sub>PAE by II</sub></b> | <b>P<sub>PAE by II</sub></b> |
| <u>Maternal iron indices</u>                    |                        |                       |                              |                              |
| Ferritin (logged ug/L values) <sup>c</sup>      | -0.19                  | -0.27                 | -0.02                        | 0.934                        |
|                                                 | (-1.48, 1.11)          | (-0.69, 0.15)         | (-0.51, 0.47)                |                              |
| Hemoglobin (g/dL)                               | -3.02 <sup>†</sup>     | -0.21                 | 0.25 <sup>†</sup>            | <b>0.081</b>                 |
|                                                 | (-6.07, 0.03)          | (-0.41, 0.02)         | (-0.03, 0.53)                |                              |
| Hemoglobin:log(ferritin) <sup>d</sup>           | -1.31                  | 0.01                  | 0.23                         | 0.176                        |
|                                                 | (-2.83, 0.22)          | (-0.25, 0.28)         | (-0.11, 0.57)                |                              |
| <u>Neonatal iron indices</u>                    |                        |                       |                              |                              |
| Ferritin (logged ug/L values) <sup>c</sup>      | 1.26                   | -0.06                 | -0.30                        | 0.211                        |
|                                                 | (-1.24, 3.77)          | (-0.38, 0.25)         | (-0.77, 0.17)                |                              |
| Hemoglobin (g/dL)                               | -1.26                  | 0.00                  | 0.06                         | 0.353                        |
|                                                 | (-3.33, 0.80)          | (-0.09, 0.09)         | (-0.07, 0.20)                |                              |
| Hemoglobin:log(ferritin) <sup>d</sup>           | -1.95*                 | 0.04                  | 0.59 <sup>†</sup>            | <b>0.059</b>                 |
|                                                 | (-3.74, 0.15)          | (-0.34, 0.42)         | (-0.02, 1.20)                |                              |
| <u>6.5-mo infant iron indices</u>               |                        |                       |                              |                              |
| Iron deficiency <sup>c,e</sup>                  | -0.43*                 | -0.35                 | 0.42                         | 0.239                        |
|                                                 | (-0.76, -0.10)         | (-0.87, 0.17)         | (-0.28, 1.12)                |                              |
| Iron deficiency anemia <sup>c,e</sup>           | -0.11                  | 0.24                  | -0.47                        | 0.323                        |
|                                                 | (-0.54, 0.33)          | (-0.47, 0.94)         | (-1.42, 0.47)                |                              |
| <hr/>                                           |                        |                       |                              |                              |
| <b>5-yr weight-for-age z-scores<sup>b</sup></b> | <b>B<sub>PAE</sub></b> | <b>B<sub>II</sub></b> | <b>B<sub>PAE by II</sub></b> | <b>P<sub>PAE by II</sub></b> |
| <u>Maternal iron indices</u>                    |                        |                       |                              |                              |
| Ferritin (logged ug/L values) <sup>c</sup>      | -0.51                  | -0.37                 | 0.05                         | 0.838                        |

|                                            |                    |                   |                |       |
|--------------------------------------------|--------------------|-------------------|----------------|-------|
|                                            | (-1.75, 0.73)      | (-0.76, 0.03)     | (-0.41, 0.52)  |       |
| Hemoglobin (g/dL)                          | -1.18              | -0.11             | -0.06          | 0.645 |
|                                            | (-4.16, 1.81)      | (-0.30, 0.09)     | (-0.21, 0.34)  |       |
| Hemoglobin:log(ferritin) <sup>d</sup>      | -0.24              | 0.23 <sup>+</sup> | -0.04          | 0.803 |
|                                            | (-1.71, 1.23)      | (-0.03, 0.48)     | (-0.337, 0.28) |       |
| <u>Neonatal iron indices</u>               |                    |                   |                |       |
| Ferritin (logged ug/L values) <sup>c</sup> | 1.06               | 0.11              | -0.29          | 0.227 |
|                                            | (-1.48, 3.60)      | (-1.48, 3.60)     | (-0.77, 0.19)  |       |
| Hemoglobin (g/dL)                          | -0.51              | 0.03              | 0.00           | 0.987 |
|                                            | (-2.62, 1.59)      | (-0.07, 0.12)     | (-0.14, 0.14)  |       |
| Hemoglobin:log(ferritin) <sup>d</sup>      | -1.39              | -0.04             | 0.32           | 0.316 |
|                                            | (-3.24, 0.46)      | (-0.44, 0.35)     | (-0.31, 0.95)  |       |
| <u>6.5-mo infant iron indices</u>          |                    |                   |                |       |
| Iron deficiency <sup>c,e</sup>             | -0.57***           | -0.01             | 0.20           | 0.560 |
|                                            | (-0.89, 0.25)      | (-0.51, 0.49)     | (-0.48, 0.88)  |       |
| Iron deficiency anemia <sup>c,e</sup>      | -0.42 <sup>+</sup> | 0.24              | -0.31          | 0.530 |
|                                            | (-0.87, 0.03)      | (-0.49, 0.96)     | (-1.29, 0.67)  |       |

#### 5-yr head circumference (cm)

|                                            | B <sub>PAE</sub> | B <sub>II</sub> | B <sub>PAE by II</sub> | P <sub>PAE by II</sub> |
|--------------------------------------------|------------------|-----------------|------------------------|------------------------|
| <u>Maternal iron indices</u>               |                  |                 |                        |                        |
| Ferritin (logged ug/L values) <sup>c</sup> | -2.38            | -0.05           | 0.21                   | 0.789                  |
|                                            | (-6.47, 1.71)    | (-1.36, 1.26)   | (-1.34, 1.76)          |                        |
| Hemoglobin (g/dL)                          | -6.19            | 0.08            | 0.40                   | 0.363                  |
|                                            | (-15.63, 3.26)   | (-0.53, 0.68)   | (-0.46, 1.26)          |                        |
| Hemoglobin:log(ferritin) <sup>d</sup>      | -0.89            | 0.16            | 0.21                   | 0.704                  |
|                                            | (-5.68, 3.90)    | (-0.68, 0.99)   | (-1.27, 0.86)          |                        |
| <u>Neonatal iron indices</u>               |                  |                 |                        |                        |
| Ferritin (logged ug/L values) <sup>c</sup> | -3.44            | 0.15            | 0.32                   | 0.699                  |
|                                            | (-12.05, 5.17)   | (-0.94, 1.24)   | (-1.30, 1.93)          |                        |
| Hemoglobin (g/dL)                          | -3.73            | 0.00            | 0.13                   | 0.590                  |
|                                            | (-10.78, 3.33)   | (-0.31, 0.31)   | (-0.33, 0.59)          |                        |
| Hemoglobin:log(ferritin) <sup>d</sup>      | -2.30            | -0.04           | 0.17                   | 0.877                  |
|                                            | (-8.58, 3.99)    | (-1.38, 1.30)   | (-1.98, 2.31)          |                        |
| <u>6.5-mo infant iron indices</u>          |                  |                 |                        |                        |
| Iron deficiency <sup>c,e</sup>             | -1.86***         | 0.21            | 0.06                   | 0.954                  |
|                                            | (-2.91, -0.82)   | (-1.41, 1.84)   | (-2.13, 2.25)          |                        |
| Iron deficiency anemia <sup>c,e</sup>      | -1.10***         | 0.25            | -0.16                  | 0.827                  |
|                                            | (-1.76, -0.44)   | (-0.83, 1.32)   | (-1.62, 1.30)          |                        |

**(B) Neurobehavior**

| <b>Visual recognition memory (6.5 mo)<sup>f</sup></b> | <b>B<sub>PAE</sub></b> | <b>B<sub>II</sub></b> | <b>B<sub>PAE by II</sub></b> | <b>P<sub>PAE by II</sub></b> |
|-------------------------------------------------------|------------------------|-----------------------|------------------------------|------------------------------|
| <u>Maternal iron indices</u>                          |                        |                       |                              |                              |
| Ferritin (logged ug/L values) <sup>c</sup>            | 9.02*                  | 2.26                  | -3.94*                       | <b>0.021</b>                 |
|                                                       | (0.09, 17.96)          | (-0.52, 5.04)         | (-7.28, -0.60)               |                              |
| Hemoglobin (g/dL)                                     | 18.25                  | 0.65                  | -1.78                        | 0.115                        |
|                                                       | (-6.20, 42.69)         | (-0.78, 2.09)         | (-3.99, -0.44)               |                              |
| Hemoglobin:log(ferritin) <sup>d</sup>                 | -9.87 <sup>+</sup>     | -1.11                 | -1.92                        | 0.115                        |
|                                                       | (-20.74, 1.01)         | (-2.91, 0.70)         | (-0.48, 4.32)                |                              |
| <u>Neonatal iron indices</u>                          |                        |                       |                              |                              |
| Ferritin (logged ug/L values) <sup>c</sup>            | 14.68                  | 0.93                  | 2.94                         | 0.123                        |
|                                                       | (-5.04, 34.41)         | (-1.46, 3.32)         | (-6.69, 0.81)                |                              |
| Hemoglobin (g/dL)                                     | 9.84                   | 0.52                  | -0.73                        | 0.170                        |
|                                                       | (-6.39, 26.08)         | (-0.13, 1.16)         | (-1.78, 0.32)                |                              |
| Hemoglobin:log(ferritin) <sup>d</sup>                 | 1.84                   | 1.60                  | -0.91                        | 0.726                        |
|                                                       | (-13.46, 17.13)        | (-1.34, 4.54)         | (-6.02, 4.21)                |                              |
| <u>6.5-mo infant iron indices</u>                     |                        |                       |                              |                              |
| Iron deficiency <sup>c,e</sup>                        | -1.09                  | 0.50                  | -0.30                        | 0.904                        |
|                                                       | (-3.71, 1.54)          | (-3.19, 4.19)         | (-5.24, 4.64)                |                              |
| Iron deficiency anemia <sup>c,e</sup>                 | -1.95                  | 0.21                  | -0.03                        | 0.993                        |
|                                                       | (-5.40, 1.50)          | (-4.85, 5.27)         | (-6.77, 6.71)                |                              |
| <b>Visual recognition memory (12 mo)<sup>f</sup></b>  | <b>B<sub>PAE</sub></b> | <b>B<sub>II</sub></b> | <b>B<sub>PAE by II</sub></b> | <b>P<sub>PAE by II</sub></b> |
| <u>Maternal iron indices</u>                          |                        |                       |                              |                              |
| Ferritin (logged ug/L values) <sup>c</sup>            | -3.52                  | 0.23                  | 0.41                         | 0.824                        |
|                                                       | (-13.24, 6.20)         | (-2.83, 3.29)         | (-3.25, 4.07)                |                              |
| Hemoglobin (g/dL)                                     | -27.65*                | -0.74                 | 2.32*                        | <b>0.038</b>                 |
|                                                       | (-51.65, -3.66)        | (-2.28, 0.81)         | (0.13, 4.50)                 |                              |
| Hemoglobin:log(ferritin) <sup>d</sup>                 | 0.68                   | 12.56                 | -12.87                       | 0.557                        |
|                                                       | (-9.76, 11.11)         | (-23.66, 48.78)       | (-56.12, 30.38)              |                              |
| <u>Neonatal iron indices</u>                          |                        |                       |                              |                              |
| Ferritin (logged ug/L values) <sup>c</sup>            | -4.74                  | -2.13                 | 0.48                         | 0.820                        |
|                                                       | (-26.66, 17.19)        | (-4.82, 0.56)         | (-3.66, 4.61)                |                              |
| Hemoglobin (g/dL)                                     | 2.20                   | -0.30                 | -0.35                        | 0.531                        |
|                                                       | (-14.79, 19.20)        | (-1.00, 0.41)         | (-1.45, 0.75)                |                              |
| Hemoglobin:log(ferritin) <sup>d</sup>                 | -11.74                 | -8.16                 | 23.23                        | 0.268                        |
|                                                       | (-26.74, 3.25)         | (-35.88, 19.57)       | (-18.18, 64.64)              |                              |

### 6.5-mo infant iron indices

|                                       |                |               |                |       |
|---------------------------------------|----------------|---------------|----------------|-------|
| Iron deficiency <sup>c,e</sup>        | -3.18*         | -0.51         | 2.92           | 0.275 |
|                                       | (-5.91, -0.46) | (-4.56, 3.54) | (-2.35, 8.19)  |       |
| Iron deficiency anemia <sup>c,e</sup> | -4.55*         | -3.19         | 5.77           | 0.118 |
|                                       | (-8.12, -0.98) | (-8.70, 2.32) | (-1.50, 13.05) |       |

---

### **Information processing time (6.5 mo)<sup>f</sup>**

#### Maternal iron indices

|                                            |               |               |                    |              |
|--------------------------------------------|---------------|---------------|--------------------|--------------|
| Ferritin (logged ug/L values) <sup>c</sup> | -0.25         | 0.02          | -0.09              | 0.437        |
|                                            | (-0.39, 0.89) | (-0.18, 0.22) | (-0.33, 0.14)      |              |
| Hemoglobin (g/dL)                          | 1.46          | -0.03         | -0.13 <sup>+</sup> | <b>0.091</b> |
|                                            | (-0.23, 3.15) | (-0.13, 0.07) | (-0.28, 0.02)      |              |
| Hemoglobin:log(ferritin) <sup>d</sup>      | 0.35          | 1.27          | -1.58              | 0.274        |
|                                            | (-0.34, 1.04) | (-1.12, 3.67) | (-4.42, 1.26)      |              |

#### Neonatal iron indices

|                                            |               |                |               |       |
|--------------------------------------------|---------------|----------------|---------------|-------|
| Ferritin (logged ug/L values) <sup>c</sup> | 0.42          | -0.03          | 0.08          | 0.447 |
|                                            | (-1.54, 0.70) | (-0.16, -0.11) | (-0.13, 0.29) |       |
| Hemoglobin (g/dL)                          | -0.06         | 0.00           | 0.00          | 0.997 |
|                                            | (-0.91, 1.03) | (-0.04, 0.04)  | (-0.06, 0.06) |       |
| Hemoglobin:log(ferritin) <sup>d</sup>      | -0.28         | -0.18          | 0.88          | 0.450 |
|                                            | (-1.10, 0.54) | (-1.59, 1.23)  | (-1.43, 3.19) |       |

### 6.5-mo infant iron indices

|                                       |                    |               |                   |              |
|---------------------------------------|--------------------|---------------|-------------------|--------------|
| Iron deficiency <sup>c,e</sup>        | -0.04              | -0.07         | 0.06              | 0.713        |
|                                       | (-0.22, 0.15)      | (-0.33, 0.19) | (-0.28, 0.41)     |              |
| Iron deficiency anemia <sup>b,e</sup> | -0.22 <sup>+</sup> | -0.01         | 0.42 <sup>+</sup> | <b>0.088</b> |
|                                       | (-0.46, 0.02)      | (-0.38, 0.35) | (-0.06, 0.91)     |              |

---

### **Information processing time (12 mo)<sup>f</sup>**

#### Maternal iron indices

|                                            |               |               |               |       |
|--------------------------------------------|---------------|---------------|---------------|-------|
| Ferritin (logged ug/L values) <sup>c</sup> | -0.20         | -0.01         | 0.11          | 0.356 |
|                                            | (-0.85, 0.44) | (-0.21, 0.19) | (-0.13, 0.35) |       |
| Hemoglobin (g/dL)                          | 0.11          | 0.01          | 0.00          | 0.994 |
|                                            | (-1.51, 1.73) | (-0.09, 0.12) | (-0.15, 0.15) |       |
| Hemoglobin:log(ferritin) <sup>d</sup>      | 0.50          | 0.01          | -0.09         | 0.269 |
|                                            | (-0.24, 1.24) | (-0.12, 0.13) | (-0.26, 0.07) |       |

#### Neonatal iron indices

|                                            |      |       |       |       |
|--------------------------------------------|------|-------|-------|-------|
| Ferritin (logged ug/L values) <sup>c</sup> | 0.50 | -0.02 | -0.08 | 0.559 |
|--------------------------------------------|------|-------|-------|-------|

|                                            |                        |                       |                              |                              |
|--------------------------------------------|------------------------|-----------------------|------------------------------|------------------------------|
|                                            | (-0.88, 1.89)          | (-0.19, 0.15)         | (-0.34, 0.18)                |                              |
| Hemoglobin (g/dL)                          | 0.20                   | -0.01                 | -0.01                        | 0.858                        |
|                                            | (-0.89, 1.28)          | (-0.08, 0.06)         | (-0.08, 0.06)                |                              |
| Hemoglobin:log(ferritin) <sup>d</sup>      | 0.04                   | -0.02                 | 0.02                         | 0.909                        |
|                                            | (-0.95, 1.03)          | (-0.19, 0.22)         | (-0.32, 0.36)                |                              |
| <u>6.5-mo infant iron indices</u>          |                        |                       |                              |                              |
| Iron deficiency <sup>c,e</sup>             | 0.03                   | 0.07                  | 0.22                         | 0.199                        |
|                                            | (-0.14, 0.21)          | (-0.19, 0.33)         | (-0.12, 0.56)                |                              |
| Iron deficiency anemia <sup>c,e</sup>      | 0.21                   | 0.10                  | -0.09                        | 0.725                        |
|                                            | (-0.03, 0.45)          | (-0.27, 0.46)         | (-0.57, 0.40)                |                              |
| <hr/>                                      |                        |                       |                              |                              |
| <b>Symbolic Play<sup>g</sup></b>           | <b>B<sub>PAE</sub></b> | <b>B<sub>II</sub></b> | <b>B<sub>PAE by II</sub></b> | <b>P<sub>PAE by II</sub></b> |
| <u>Maternal iron indices</u>               |                        |                       |                              |                              |
| Ferritin (logged ug/L values) <sup>c</sup> | 2.61                   | 0.78                  | -1.04                        | 0.288                        |
|                                            | (-2.47, 7.69)          | (-0.88, 2.44)         | (-2.97, 0.89)                |                              |
| Hemoglobin (g/dL)                          | -5.41                  | -0.01                 | 0.48                         | 0.392                        |
|                                            | (-17.67, 6.85)         | (-0.78, 0.76)         | (-0.63, 1.60)                |                              |
| Hemoglobin:log(ferritin) <sup>d</sup>      | 4.63                   | -0.62                 | 1.04                         | 0.112                        |
|                                            | (-10.46, 1.19)         | (-1.65, 0.40)         | (-0.25, 2.33)                |                              |
| <u>Neonatal iron indices</u>               |                        |                       |                              |                              |
| Ferritin (logged ug/L values) <sup>c</sup> | -1.48                  | -0.21                 | 0.31                         | 0.744                        |
|                                            | (-11.53, 8.58)         | (-1.49, 1.07)         | (-1.59, 2.21)                |                              |
| Hemoglobin (g/dL)                          | -5.43                  | 0.09                  | 0.37                         | 0.161                        |
|                                            | (-13.43, 2.57)         | (-0.27, 0.44)         | (-0.15, 0.90)                |                              |
| Hemoglobin:log(ferritin) <sup>d</sup>      | 3.46                   | -0.47                 | 1.28                         | 0.306                        |
|                                            | (-10.71, 3.79)         | (-10.71, 3.79)        | (-1.19, 3.75)                |                              |
| <u>6.5-mo infant iron indices</u>          |                        |                       |                              |                              |
| Iron deficiency <sup>c,e</sup>             | -0.30                  | -0.30                 | -0.66                        | 0.625                        |
|                                            | (-2.35, 1.75)          | (-2.35, 1.75)         | (-3.33, 2.01)                |                              |
| Iron deficiency anemia <sup>c,e</sup>      | 0.18                   | -0.01                 | -1.92                        | 0.251                        |
|                                            | (-1.03, 1.39)          | (-2.57, 2.54)         | (-5.20, 1.37)                |                              |

**(C) Temperament<sup>h</sup>**

|                                            |                        |                       |                              |                              |
|--------------------------------------------|------------------------|-----------------------|------------------------------|------------------------------|
| <b>Emotionality</b>                        | <b>B<sub>PAE</sub></b> | <b>B<sub>II</sub></b> | <b>B<sub>PAE by II</sub></b> | <b>P<sub>PAE by II</sub></b> |
| <u>Maternal iron indices</u>               |                        |                       |                              |                              |
| Ferritin (logged ug/L values) <sup>c</sup> | 0.24                   | 0.08                  | -0.06                        | 0.603                        |
|                                            | (-0.34, 0.82)          | (-0.11, 0.26)         | (-0.27, 0.16)                |                              |

|                                            |                        |                       |                        |       |
|--------------------------------------------|------------------------|-----------------------|------------------------|-------|
| Hemoglobin (g/dL)                          | 1.19<br>(-0.27, 2.65)  | 0.07<br>(-0.02, 0.16) | -0.10<br>(-0.23, 0.03) | 0.143 |
| Hemoglobin:log(ferritin) <sup>d</sup>      | 0.01<br>(-0.61, 0.63)  | 0.13<br>(-2.05, 2.31) | 0.37<br>(-2.19, 2.92)  | 0.776 |
| <u>Neonatal iron indices</u>               |                        |                       |                        |       |
| Ferritin (logged ug/L values) <sup>c</sup> | -0.71<br>(-0.48, 1.90) | 0.15*<br>(0.00, 0.29) | -0.12<br>(-0.35, 0.10) | 0.276 |
| Hemoglobin (g/dL)                          | 0.57<br>(-0.45, 1.59)  | 0.01<br>(-0.04, 0.05) | -0.03<br>(-0.10, 0.03) | 0.346 |
| Hemoglobin:log(ferritin) <sup>d</sup>      | 0.19<br>(-0.69, 1.07)  | 0.85<br>(-0.84, 2.55) | -0.35<br>(-2.82, 2.12) | 0.779 |
| <u>6.5-mo infant iron indices</u>          |                        |                       |                        |       |
| Iron deficiency <sup>c,e</sup>             | 0.10<br>(-0.07, 0.26)  | 0.12<br>(-0.12, 0.35) | 0.05<br>(-0.26, 0.36)  | 0.740 |
| Iron deficiency anemia <sup>c,e</sup>      | 0.11<br>(-0.10, 0.32)  | 0.03<br>(-0.30, 0.36) | 0.00<br>(-0.43, 0.43)  | 0.998 |

| Activity                                   | B <sub>PAE</sub>       | B <sub>II</sub>         | B <sub>PAE by II</sub> | P <sub>PAE by II</sub> |
|--------------------------------------------|------------------------|-------------------------|------------------------|------------------------|
| <u>Maternal iron indices</u>               |                        |                         |                        |                        |
| Ferritin (logged ug/L values) <sup>c</sup> | 0.07<br>(-0.57, 0.71)  | 0.06<br>(-0.14, 0.26)   | -0.05<br>(-0.25, 0.18) | 0.653                  |
| Hemoglobin (g/dL)                          | -0.10<br>(-1.72, 1.53) | 0.03<br>(-0.07, 0.13)   | 0.00<br>(-0.15, 0.15)  | 0.973                  |
| Hemoglobin:log(ferritin) <sup>d</sup>      | 0.25<br>(-0.98, 0.49)  | -0.02<br>(-0.15, 0.11)  | 0.04<br>(-0.12, 0.21)  | 0.508                  |
| <u>Neonatal iron indices</u>               |                        |                         |                        |                        |
| Ferritin (logged ug/L values) <sup>c</sup> | 0.11<br>(-1.27, 1.49)  | 0.08<br>(-0.10, 0.25)   | -0.03<br>(-0.29, 0.23) | 0.798                  |
| Hemoglobin (g/dL)                          | -0.84<br>(-1.96, 0.28) | -0.01<br>(-0.06, 0.04)  | 0.05<br>(-0.02, 0.13)  | 0.154                  |
| Hemoglobin:log(ferritin) <sup>d</sup>      | -0.82<br>(-1.83, 0.19) | -0.13<br>(-0.34, 0.80)  | -0.27<br>(-0.07, 0.61) | 0.120                  |
| <u>6.5-mo infant iron indices</u>          |                        |                         |                        |                        |
| Iron deficiency <sup>c,e</sup>             | -0.05<br>(-0.22, 0.13) | -0.26*<br>(-0.52, 0.00) | 0.07<br>(-0.26, 0.41)  | 0.673                  |
| Iron deficiency anemia <sup>c,e</sup>      | -0.04<br>(-0.25, 0.18) | -0.29<br>(-0.64, 0.06)  | 0.13<br>(-0.32, 0.58)  | 0.574                  |



| <b>Sociability</b>                         | <b>B<sub>PAE</sub></b> | <b>B<sub>II</sub></b>  | <b>B<sub>PAE by II</sub></b> | <b>P<sub>PAE by II</sub></b> |
|--------------------------------------------|------------------------|------------------------|------------------------------|------------------------------|
| <u>Maternal iron indices</u>               |                        |                        |                              |                              |
| Ferritin (logged ug/L values) <sup>c</sup> | 0.15<br>(-0.48, 0.79)  | -0.03<br>(-0.23, 0.17) | -0.04<br>(-0.28, 0.20)       | 0.721                        |
| Hemoglobin (g/dL)                          | 0.32<br>(-1.28, 1.92)  | -0.08<br>(-0.18, 0.03) | -0.03<br>(-0.17, 0.12)       | 0.726                        |
| Hemoglobin:log(ferritin) <sup>d</sup>      | -0.17<br>(-0.92, 0.58) | -0.01<br>(-0.14, 0.12) | 0.05<br>(-0.12, 0.21)        | 0.595                        |
| <u>Neonatal iron indices</u>               |                        |                        |                              |                              |
| Ferritin (logged ug/L values) <sup>c</sup> | 0.70<br>(-0.76, 2.17)  | -0.02<br>(-0.20, 0.17) | -0.13<br>(-0.41, 0.15)       | 0.354                        |
| Hemoglobin (g/dL)                          | 0.46<br>(-0.74, 1.67)  | 0.01<br>(-0.04, 0.06)  | -0.03<br>(-0.11, 0.05)       | 0.438                        |
| Hemoglobin:log(ferritin) <sup>d</sup>      | 0.20<br>(-0.89, 1.29)  | 0.10<br>(-0.14, 0.33)  | -0.07<br>(-0.43, 0.30)       | 0.721                        |
| <u>6.5-mo infant iron indices</u>          |                        |                        |                              |                              |
| Iron deficiency <sup>c,e</sup>             | 0.02<br>(-0.16, 0.21)  | -0.11<br>(-0.37, 0.16) | -0.02<br>(-0.36, 0.33)       | 0.922                        |
| Iron deficiency anemia <sup>c,e</sup>      | -0.13<br>(-0.37, 0.12) | -0.18<br>(-0.56, 0.19) | 0.32<br>(-0.17, 0.80)        | 0.200                        |
| <b>Shyness</b>                             | <b>B<sub>PAE</sub></b> | <b>B<sub>II</sub></b>  | <b>B<sub>PAE by II</sub></b> | <b>P<sub>PAE by II</sub></b> |
| <u>Maternal iron indices</u>               |                        |                        |                              |                              |
| Ferritin (logged ug/L values) <sup>c</sup> | -0.26<br>(-0.97, 0.45) | -0.09<br>(-0.31, 0.14) | 0.13<br>(-0.13, 0.40)        | 0.319                        |
| Hemoglobin (g/dL)                          | 0.20<br>(-1.60, 1.99)  | 0.09<br>(-0.03, 0.20)  | -0.01<br>(-0.18, 0.15)       | 0.885                        |
| Hemoglobin:log(ferritin) <sup>d</sup>      | -0.39<br>(-1.15, 0.36) | -1.87<br>(-4.52, 0.78) | 2.10<br>(-1.02, 5.21)        | 0.186                        |
| <u>Neonatal iron indices</u>               |                        |                        |                              |                              |
| Ferritin (logged ug/L values) <sup>c</sup> | -0.78<br>(-2.30, 0.74) | -0.08<br>(-0.27, 0.11) | 0.17<br>(-0.12, 0.46)        | 0.247                        |
| Hemoglobin (g/dL)                          | -0.24<br>(-1.52, 1.05) | -0.03<br>(-0.08, 0.03) | 0.02<br>(-0.06, 0.11)        | 0.604                        |
| Hemoglobin:log(ferritin) <sup>d</sup>      | -0.11<br>(-1.23, 1.02) | -0.24<br>(-1.92, 2.39) | 0.52<br>(-2.61, 3.65)        | 0.742                        |
| <u>6.5-mo infant iron indices</u>          |                        |                        |                              |                              |

|                                       |                       |                       |                        |       |
|---------------------------------------|-----------------------|-----------------------|------------------------|-------|
| Iron deficiency <sup>c,e</sup>        | 0.12<br>(-0.07, 0.32) | 0.28*<br>(0.00, 0.57) | -0.19<br>(-0.56, 0.19) | 0.334 |
| Iron deficiency anemia <sup>c,e</sup> | 0.09<br>(-0.18, 0.35) | 0.15<br>(-0.26, 0.56) | -0.24<br>(-0.77, 0.29) | 0.369 |

<sup>a</sup>Values are raw regression coefficients (95% confidence intervals) from linear regression models regressing a given outcome on PAE ( $B_{PAE}$ ), the given iron measure ( $B_{II}$ ), a PAE x iron measure outcome ( $B_{PAE \text{ by } II}$ ,  $p_{PAE \text{ by } II}$ ), and potential confounders (maternal age, prenatal cigarettes/day, maternal education, and wk gestation at delivery for anthropometry measures, with the addition of age at time of measurement for 5-yr head circumference; maternal age, gravidity, and wk gestation at delivery for visual recognition memory; maternal education, wk gestation at delivery, infant sex, and age at time of assessment for symbolic play; gravidity and socioeconomic status for emotionality; infant sex for activity; gravidity and prenatal methamphetamine use (days/mo) for sociability; prenatal cigarette smoking (cigarettes/day) and marijuana use (days/mo) for shyness).

<sup>b</sup>Age/sex-specific z-scores from World Health Organization norms [1];  $n = 61$  controls, 69 heavily exposed at 2 wk; 67 controls, 80 heavily exposed at 5 yr.

<sup>c</sup>Positively related to prenatal alcohol exposure in previously published analyses [6].

<sup>d</sup>Negatively related to prenatal alcohol exposure in previously published analyses [6].

<sup>e</sup>Yes = 1; no = 0.

<sup>f</sup>From the Fagan Test of Infant Intelligence [2,3];  $n = 69$  controls, 75 heavily exposed at 6.5 mo.

<sup>g</sup>Highest level of complexity of imitated play [4];  $n = 64$  controls, 78 heavily exposed.

<sup>h</sup>Emotionality, Activity, Sociability Temperament scale [5];  $n = 70$  controls, 81 heavily exposed.

<sup>†</sup> $p < 0.10$ ; \* $p < 0.05$ ; \*\* $p < 0.01$ ; \*\*\* $p < 0.001$ .

## References

1. de Onis, M.; Garza, C.; Victora, C.G.; Onyango, A.W.; Frongillo, E.A.; Martines, J. The WHO Multicentre Growth Reference Study: planning, study design, and methodology. *Food Nutr Bull* **2004**, *25*, S15-26.
2. Fagan, J.F.; Singer, L.T. Infant recognition memory as a measure of intelligence. In *Advances in infancy research*, Lipsett, L.P., Ed. Ablex: Norwood, NJ, 1983; Vol. 2.
3. Jacobson, S.W.; Jacobson, J.L.; O'Neill, J.M.; Padgett, R.J.; Frankowski, J.J.; Bihun, J.T. Visual expectation and dimensions of infant information processing. *Child Dev* **1992**, *63*, 711-724.
4. Belsky, J.; Garduque, L.; Hrcir, E. Assessing performance, competence, and executive capacity in infant play. *Dev Psychol* **1984**, *20*, 406-417.
5. Buss, A.H.; Plomin, R. *Temperament: Early Developing Personality Traits*; Lawrence Erlbaum: Hillsdale, NJ, 1984.
6. Carter, R.C.; Georgieff, M.K.; Ennis, K.M.; Dodge, N.C.; Wainwright, H.; Meintjes, E.M.; Duggan, C.P.; Molteno, C.D.; Jacobson, J.L.; Jacobson, S.W. Prenatal alcohol-related alterations in maternal, placental, neonatal, and infant iron homeostasis. *Am J Clin Nutr* **2021**, *114*, 1107-1122, doi:10.1093/ajcn/nqab165.
